# Supplementary material for: Aerosol effective radius governs the relationship between cloud condensation nuclei (CCN) concentration and aerosol backscatter
Source: Copernicus journal article supplement (doi:10.5194/egusphere-2025-2422), 2025-06-04
Supplement: Supplementary file [file egusphere-2025-2422-AC2-supplement.pdf]

## Response to Reviewer 2:

We would like to thank the reviewer for the constructive feedback on our manuscript and for aiding our progress towards publication. These comments were very useful, and we appreciate the time taken to help improve the paper. Each comment is repeated here, and our responses are given below each one in blue text. Excerpts from the text of the paper are given in *italics*, where **new additions are bolded** and text removed is noted using ~~striketrough~~. All line numbers mentioned in our responses correspond to the line numbers in the updated version of the manuscript.

The authors present a systematic observation- and modeling-based investigation of the relationship between the optical properties measured with lidar (particle backscatter coefficient, BSC) and the concentration of cloud condensation nuclei (CCN), i.e., of the number concentration of particles that can be activated to form cloud droplets. The paper is well written and a very good contribution to the lidar literature. The authors combined lidar observations of backscatter profiles with airborne in situ measurements of CCN. As a strong part of the manuscript, they included complex modeling of CCN and lidar backscatter coefficients. In this way, they clearly showed the dependence of the CCN-to-BSC conversion factor on the effective radius of the CCN.

A minor weak point is that they do not discuss and compare their effort with other methods. The use of conversion factors for different aerosol types (characterized by different effective radii) is indirectly the same approach than the one offered in the manuscript. Furthermore, the new approach is applicable to mixtures of hygroscopic particles (urban haze, marine particles, wild fires smoke), only! It is not applicable in the case of mixtures that include hydrophobic particles such as mineral dust. Then the different aerosol fractions have to be separated before a conversion into the dust and non-dust CCN fractions can be done. This point needs to be better addressed in the manuscript.

Thank you for the feedback on our study. As we will continue to discuss in response to some of the comments below, the point about lack of applicability of this method to mixtures with hydrophobic particles such as mineral dust is well-taken. We recognize that this study and the exact methods will not apply to dust aerosols, and this was not properly addressed in the original version of the manuscript. We have added a few places of discussion to the paper regarding this and will highlight them as they pertain to specific comments below.

In terms of a discussion/comparison of this effort with other methods, we are unaware of many other such studies that directly convert lidar observables to CCN concentration besides Haarig et al. (2019), as referenced in a comment below, and Lenhardt et al. (2023), which this study was largely motivated by. If there are others that use a conversion method as opposed to a physics-based retrieval or parameterization method, we would be happy to look into them further. Therefore, while we haven't addressed this type of approach specifically, a short paragraph was added to the beginning of Sect. 5 that acknowledges previous, related work using a variety of methods to get from lidar to CCN information and briefly discusses and summarizes the main differences in the work we have presented. This paragraph is in Lines 524-531 and reads as:

***“Several recent studies have used lidar observed aerosol optical properties to develop physics-based or ML (Machine Learning)-based parameterizations and retrieval methods for CCN concentration for different aerosol types (Mamouri & Ansmann, 2016; Lv et al., 2018; Haarig et al., 2019; Choudhury & Tesche, 2022a; Patel et al., 2024; Redemann & Gao, 2024). In this study, we have included in situ observed aerosol size and chemical composition information to determine which factors most strongly govern the  $CCN_{theory} - BSC_{theory}$  relationship. Therefore, this analysis provides a broad theoretical context in which relationships between observed CCN and aerosol optical properties can be interpreted. In this section, we discuss the physical interpretation of the relationships found, implications for future remote sensing techniques, and a summary of the sources of uncertainty and limitations of the study.”***

The manuscript is a methodology paper, and thus appropriate to AMT and should, to my opinion, be published in AMT, and not in ACP.

Respectfully, we do not agree with the assessment of our work as a methodology study – rather, the study aims to understand the underlying governing factors of the relationship between CCN and BSC from a theoretical perspective. In addition, we maintain that this manuscript is appropriate for ACP due to the broad applicability for future studies that will use lidar observables to retrieve CCN concentration. This is reflected by our statement in the abstract that the purpose of the theoretical calculations is “*understanding the dominant governing factors of the  $CCN_{theory} - BSC_{theory}$  relationship*” and why we end the abstract with a statement about how “*including information about aerosol size is critical for future studies in constraining CCN concentration from AOPs.*”

Minor revisions are needed.

**Detailed comments:**

**Section 1** provides a good overview of CCN retrievals from optical measurements. One could even avoid a too broad discussion by focusing on profiling techniques.

Since our goal in future studies for a vertically resolved CCN product is to assess aerosol-cloud interactions, we decided to keep this information in the introduction. Additionally, we wanted to briefly discuss previous literature related to aerosol size and RH and how they impact both CCN and optical properties as an introduction to what we will focus on in the rest of the paper.

**Section 2:** Impressive field campaign! ‘Unfortunately’, the observed aerosol mixtures do not represent the full spectrum of relevant aerosol mixtures. The airborne HSRL-2, part of ACTIVATE, conducted many campaigns in the Caribbean and over the United States and detected mixtures of dust and non-dust components. One can find these relevant mixtures almost everywhere in the northern hemisphere, over all continents and adjacent oceans. However, this mixture is not covered in this study. This point needs to be better considered in the concluding discussion later on.

While we did not include HSRL-2 Aerosol ID identified observations of dust in this analysis, the observed aerosol types from ACTIVATE have been shown to be well-representative of mixtures of aerosol types observed in other campaigns (Fig S6 from [Redemann & Gao, 2024](#)), including in terms of dust components. Because of the statistical preponderance of what the HSRL-2 qualitatively identifies as smoke/fresh smoke, marine/polluted marine, and urban aerosol types, we focus on these types for our analysis. However, because of the qualitative nature of the HSRL typing technique, it is likely that there is a small amount of dust included in any of the aerosol types used in this study. Hence, inherently and to a certain extent, mixtures containing dust are likely included in our study. However, the reviewer’s point about dust-*dominated* mixtures not being covered in the study is well taken. We have added some discussion to the final paragraph of Sect. 5.3 to 1) clarify that our results only hold for the aerosol mixtures observed in the ACTIVATE region and 2) speak to different considerations that would need to be made for mixtures including a larger proportion of dust. This adjustment is detailed in our response to the second to last comment in this document.

The wavelength of 532 nm is only mentioned in Section 2. It would be good to mention the wavelengths occasionally in the next sections (maybe also in some of the figure captions). A mention of the 532 nm wavelength was added to the captions for Fig. 2 and 6. We also added brief mentions of the 532 nm wavelength in Lines 302, 314, 399, and 647.

P5, line 127: Please define R2!

In Lines 129-131 of the revised version, we now define  $R^2$  (and RMSE) in the following sentence:

*“Additionally, we show **the coefficient of determination ( $R^2$ ), a measure of the proportion of variation in  $CCN_{obs}$  that is explained by variation in  $BSC_{obs}$ , root mean square error (RMSE), a measure of the average difference between linear regression predicted  $CCN$  and  $CCN_{obs}$ , and number of data points ( $n$ ).**”*

P5, line 132:  $R$  is not introduced! You write:  $R^2$  values ranged from 0.0014 – 0.14 for all RH cases, and 0.0023-0.038 for RH<50%. I am confused! Such numbers indicate no correlation at all! What did I miss?

Apologies for the confusion - by discussing these  $R^2$  values, the goal was to show that the correlations are weak (in contrast to our previous paper focusing on the ORACLES data set). To make this point clearer, Lines 135-137 have been adjusted to read as:

*“ $R^2$  values for all aerosol types across the full RH spectrum range from 0.0014-0.14, and for  $RH \leq 50\%$  range from 0.0023-0.038, **suggesting that there is no aerosol type for which variations in  $CCN_{obs}$  are well-explained by changes in  $BSC_{obs}$ .** For all RHs, ~~the correlation~~  $R^2$  is strongest for URB, while smoke has the highest ~~correlation~~  $R^2$  under limited RH conditions.”*

P 7, line 192: HSRL-2 Aerosol ID product! Is that defined somewhere? Please explain in a bit more detail!

Our definition for the HSRL-2 Aerosol ID product is now provided in Lines 201-206. To clarify that it is an additional HSRL-2 variable provided in the observed data set (and not a separate data set/product), the sentence in Lines 201-202 now reads as:

*“Additionally, since we are interested in the impact of different aerosol types on the  $CCN - BSC$  relationship, we also use the HSRL-2 Aerosol ID **product variable from the observed data set.**”*

P8, line 195: You define eight, not just well-defined aerosol types! Afterwards you combine marine and polluted marine, aged smoke and fresh smoke, but you still have ice (is that an aerosol type?), dusty mix, and dust, and urban/pollution. What is the dusty mix? Later on, you do not consider DUST at all! Otherwise you would be in trouble with the ‘simple’ link between  $CCN/BSC$  and effective radius.

In the Aerosol ID typing algorithm defined in Burton et al. (2012), “dusty mix” is defined as “a general category that may include cases of dust mixed with a variety of other species.”

Ice refers to optically thin ice crystals/ice haze, such as that frequently observed during the ARCTAS campaign. To designate that ice isn’t really an aerosol, we refer to these categories as “particle” types. However, it is true that we do not consider dust in this study. This is due in part to the differences mentioned by the reviewer for dust (such as hydrophobicity and

non-sphericity), but also largely because observations classified as dust/dusty mix by the HSRL-2 Aerosol ID only made up only about 9% of our HSRL-2 – in situ CCN collocated data points. We added a few sentences in Lines 208-213 to clarify which of these categories we do not use and the reasoning for focusing on smoke/fresh smoke, marine/polluted marine, and urban aerosols that we had a more significant amount of data for. It reads as follows:

***“These three aerosol types are the most frequently available in the ACTIVATE data. We do not consider observations categorized as ice, dusty mix, or dust in this study. Optically thin ice is infrequently detected by the HSRL-2 in ACTIVATE and does not designate an aerosol type relevant for CCN activation. Aerosols characterized as dust or dusty mix are also infrequently observed, making up only about 9% of the data points with a valid Aerosol ID, which does not permit a statistically relevant consideration of the dust-related aerosol types. Implications regarding the applicability of this analysis for dust contributions to aerosol mixtures will be discussed in Sect. 5.3.”***

### **Section 3.3:**

P 12, line 292: Any comment on volatile aerosol components? They are lost after drying and measuring/counting dry particles in situ. Humidification will not bring them and their impact back. They are not considered in... bin diameters and refractive index components.... Humidified bin diameters and refractive index components are the final input into the Mie scattering calculation runs in libRadtran.

We acknowledge this is an important source of uncertainty that we failed to discuss in the original paper and thank the reviewer for pointing it out. We added a brief discussion on the potential impact of volatile aerosol component loss in Sect. 5.3 (Lines 625-628):

***“Lastly, aerosols may be undersized due to loss of volatile aerosol components that occurs during the heating and drying of in situ observations during inlet transmission (Shrestha et al., 2018; Sandvik et al., 2019), and this may be another source of uncertainty in  $BSC_{theory}$  and  $CCN_{theory}$  calculations.”***

### **Section 4.1:**

Figure 5: The background values in the figure should be explained in the caption.

Thank you for catching this! The Fig. 5 caption now reads as:

***“ $CCN_{obs}$  vs.  $CCN_{theory}$  for (a) smoke and fresh smoke, (b) marine and polluted marine, and (c) urban aerosols. The 1:1 lines are dashed, and the lines of best fit for the linear regressions between both variables are solid. Markers outlined in gray denote results for***

*calculations requiring a certain level of  $D_{crit}$  agreement. Results for calculations not requiring a  $D_{crit}$  agreement are shown in the background with lighter transparency to demonstrate how this requirement impacts the data set."*

Figure 5 shows the correlations for smoke, marine, and urban particles. For these aerosol types, your approach will work. As already mentioned above, in the case of mineral dust occurrence (hydrophobic particles with critical diameters around 200 nm) your approach would not work properly. You would have to use polarization lidar measurements to identify and separate the dust and non-dust contributions before estimating CCNC for the two particle fractions. The modelling part would need to consider the particle shape, which is still a big problem when it comes to BSC modeling (scattering phase function at 179.99 ° to 180°).

This aspect has to be discussed in the paper, may be at the end...

We agree with the reviewer that the difference for mineral dust is significant when it comes to the reliability of this method. We will address these considerations/differences in detail in Sect. 5.3 (changes outlined below in the final two comments). However, we would like to point out that the ACTIVATE dataset is unprecedented in its coverage of aerosol types in an airborne campaign, especially efforts that collocate remote sensing and in situ observations. The relative scarcity of ACTIVATE observations relevant for aerosol mixtures that include dust is unfortunate, but it does not detract from the novelty of analyses permitted for other aerosol types.

Equation 6: The effective radius of dry particles is given, should probably be mentioned again.

When rereading this section, we decided to clarify in a few additional places that we use the humidified size distributions for certain calculations (in addition to  $R_{eff}$ ). To start, we specified in Eq. (5) and Lines 314-317 that we use humidified radius values as follows:

$$BSC_{theory} = \int_{r_1}^{r_n} \pi r_{wet}^2 Q_{bsc} n(r_{wet}) dr_{wet}, \quad (5)$$

where  $r_{wet}$  is each humidified bin radius,  $n(r_{wet})dr_{wet}$  represents the aerosol number concentration in each bin, and  $r_n$  represents the largest bin in the SMPS and LAS combined and humidified size distribution."

Next, we made a few adjustments to clarify for Eq. (6) and (7) in Lines 446-450 that we calculate  $R_{eff}$  and GMR for humidified aerosol size distributions as follows:

$$R_{eff} = \frac{\int_0^\infty \pi r_{wet}^3 n(r_{wet}) dr_{wet}}{\int_0^\infty \pi r_{wet}^2 n(r_{wet}) dr_{wet}}, \quad (6)$$

where  $r_{wet}$  is humidified particle radius and  $n(r_{wet})dr_{wet}$  is the aerosol concentration within each bin of the humidified size distribution. Geometric mean radius is the mean of the humidified aerosol size distribution in log space, as given by Eq. (7),

$$GMR = \left( \frac{\int_0^\infty \ln r_{wet} n(r_{wet}) dr_{wet}}{N_0} \right), \quad (7)''$$

### Section 4.3

Figure 8. Without the black exponential curve fit, one would hardly see any correlation. The uncertainty is high.

There is uncertainty/scatter in this figure due to 1) the theoretical calculations of CCN and BSC being based on in situ observed aerosol size distributions and 2) each size distribution being subject to humidification at 10 RH values for these calculations. However, based on our comparisons of calculated BSC and CCN in Figures 5 and 6, we conclude that this  $CCN_{theory}:BSC_{theory}$  ratio is reasonable. To emphasize that most data is clustered around the fit line, and to make the relationship/correlation more visible, we made the marker colors correspond to the density of surrounding points. However, we realize that the RMSE value on this figure can be misleading/difficult to interpret based on the large magnitude of the  $CCN:BSC$  ratio. Therefore, to show a more straightforward measure of error and to correspond more directly with Figure 9, we added the mean relative error to Figure 8. These values range from 30-52%, suggesting that the uncertainty is relatively low and on par with that given in Figure 9. The adjusted Figure 8 is provided below:

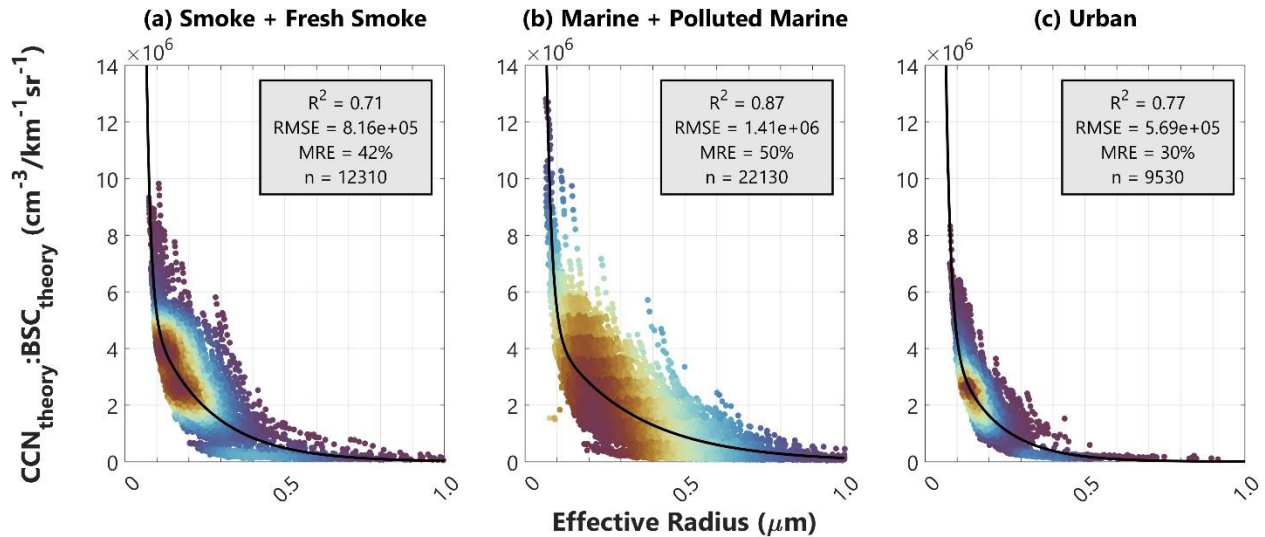

Figure 9 corroborates the applicability of the CCN-BSC approach when considering aerosol type information, i.e., when considering the effective radius. All this works for a 'pure' non-dust aerosol mixtures.



Agreed - we address the lack of applicability for dust mixtures in Sect. 5.3 (changes outlined below in the final two comments).

## Section 5.2

P 21, line 520: A simple linear approximation with BSCobs will not well constrain CCN obs in most cases. This ‘general’ statement holds for ACTIVATE aerosol mixtures. Other approaches try to find solutions to separate or isolate different aerosol types and then apply conversions. This was for example shown for Barbados dust/pollution mixtures (Haarig et al., 2019, references are given below).

We clarified that this general statement is true for ACTIVATE aerosol mixtures in Line 572: *“First, a simple linear approximation with  $BSC_{obs}$  will not well-constrain  $CCN_{obs}$  in most cases **in the ACTIVATE data set.**”*

Additionally, we included the Haarig et al. (2019) reference in Line 53 within the Introduction.

## Section 5.3

P 23, lines 565-577: One could add the original paper pointing to non spherical marine particles (Haarig et al., 2017). And regarding dust, the papers of Haarig et al. (2022) and of Saito and Ping paper (2021) provide an impression on the latest modeling approaches with focus on lidar products....

Thank you for making us aware of these additional studies. We have adjusted the sentence in Lines 619-620:

*“First, marine aerosols have a greater tendency compared to smoke and urban aerosols to be non-spherical in shape, as **was observed over Barbados by Haarig et al. (2017) and has been discussed for the ACTIVATE dataset by Ferrare et al. (2023).**...”*

Additionally, the final paragraph of Sect. 5.3 (Lines 633-642) was edited to incorporate a summary of the limitations related to the non-dust aerosol mixtures that we use for this study. We clarify that the method only applies to aerosol mixtures present over the ACTIVATE campaign region and speak to some potential difficulties of using this same method for observations of dust:

*“Lastly, there are a few important considerations for the applicability and limitations of this study. While the ACTIVATE campaign collected ~~many observations~~ **one of the most complete airborne datasets in terms of the range of aerosol types and meteorological conditions**, our findings are limited to the campaign study area and **the encountered aerosol mixtures**; they have not been tested on other datasets. **For example, since we***



*are unable to include dust in the analysis due to observational constraints, our results cannot speak to differences in the  $CCN_{theory} - BSC_{theory}$  relationship for aerosol mixtures with large proportions of dust. We would expect the results shown here to differ for observations of dust due in part to its hydrophobic nature and large, generally non-spherical sizes and shapes not easily represented using Mie theory. Recent studies have started using lidar products to better model and understand dust aerosol optical properties (Saito & Ping, 2021; Haarig et al., 2022), but more work is needed to understand the relationship between dust optical properties and its ability to activate as CCN. Additionally, as previously mentioned, we would also expect the general exponential relationship between  $CCN_{theory} \cdot BSC_{theory} - R_{eff}$  to hold for other **non-dust** data sets, but the exact fit coefficients would likely need to be adjusted.”*

## Section 6

P 24, line 601: ..that  $R_{eff}$  well captures the strong dependence of the CCN-BSC relationship on the aerosol size distribution..... YES, this is true for the ACTIVATE mixtures. Now, we need to broaden the spectrum towards dust/non-dust aerosol mixtures.

We edited the sentence in Lines 660-662 to include the following clarification:

*“Most importantly, we found through using a wide range of in situ observed size distributions that  $R_{eff}$  well-captures the strong dependence of the  $CCN_{theory} - BSC_{theory}$  relationship on the aerosol size distribution **for non-dust aerosol mixtures.**”*
